# Supplementary material for: SARS-CoV-2 Infects Endothelial Cells In Vivo and In Vitro
Source: PubMed Central journal article supplement (PMC8292147; doi:10.3389/fcimb.2021.701278), 2021-07-06
Supplement: DataSheet_3.pdf [file DataSheet_3.pdf]

Supplemental Table 1. Animal information for nonhuman primates.

| <b>Id</b> | <b>Species</b> | <b>Age (Years)</b> | <b>Sex</b> | <b>Route</b> | <b>Days Post Infection</b> |
|-----------|----------------|--------------------|------------|--------------|----------------------------|
| PA24      | GREEN/VERVET   | 19.98              | MALE       | IN/IT        | 4                          |
| PA20      | GREEN/VERVET   | 20.10              | FEMALE     | IN/IT        | 6                          |
| PA16      | GREEN/VERVET   | 19.01              | MALE       | IN/IT        | 4                          |

IN intranasal

IT intratracheal
